# Supplementary material for: Deconvolute individual genomes from metagenome sequences through short read clustering
Source: PeerJ. 2020 Apr 8;8:e8966. doi: 10.7717/peerj.8966 (PMC7150542; doi:10.7717/peerj.8966)
Supplement: Supplemental Information 2 [file peerj-08-8966-s002.xlsx]

## Sheet: S1.1
Table S1.1: Purity and completeness at the genome or species level vs the number of samples
		median completeness %	median purity % (genome/species)
5 samples	local	1.2	99.89/100.00
	global	7.69	96.96/100.00
10 samples	local	1.08	98.77/100.00
	global	11.19	95.52/100.00
20 samples	local	1.07	98.75/100.00
	global	13.53	88.89/100.00
50 samples	local	1.02	97.95/100.00
	global	19.97	93.25/99.78

## Sheet: S1.2
Table S1.1: Genome clusters with >95% purity vs the number of samples
#samples	ref_ID	ref_length(bp)	#ref_reads	ref_coverage	cluster_completeness	#cluster_ref_reads	#cluster_total_reads	cluster_purity
50	4306262	2858672	2265169	237.716	0.998563	2261914	2303113	0.982112
50	851733	2723877	6516886	717.751	0.998352	6506143	6602789	0.985363
50	192222	3553509	1736429	146.596	0.996793	1730860	1746950	0.99079
50	318732	6627518	3387718	153.348	0.995426	3372221	3496206	0.964537
50	1684221	4587353	2166476	141.681	0.994627	2154836	2191755	0.983156
50	999989	2685334	2116550	236.457	0.991959	2099531	2191095	0.958211
50	4469576	3540263	1788460	151.553	0.988992	1768773	1846979	0.957657
50	1108599	4628540	782815	50.7384	0.491101	384441	401749	0.956918
50	835900	3753503	682637	54.56	0.449124	306589	313317	0.978527
50	187223	4326619	478367	33.1691	0.311458	148991	153929	0.96792
50	1107303	3565661	500706	42.1273	0.142143	71172	72356	0.983636
20	318732	6627518	6055271	274.097	0.99799	6043101	6185355	0.977001
20	999989	2685334	2339297	261.341	0.986922	2308703	2395549	0.963747
20	4469576	3540263	3403100	288.377	0.985376	3353332	3464161	0.968007
20	4306262	2858672	4610089	483.8	0.974864	4494210	4589427	0.979253
20	4449524	3322005	1272011	114.871	0.932702	1186407	1235294	0.960425
20	851733	2723877	3579674	394.255	0.719848	2576821	2588950	0.995315
20	1684221	4587353	652380	42.6638	0.203349	132661	133544	0.993388
20	190114	3247548	859469	79.3955	0.180004	154708	156414	0.989093
20	4480176	3050713	371886	36.5704	0.158667	59006	60344	0.977827
10	4469576	3540263	4059551	344.004	0.835594	3392135	3425222	0.99034
10	318732	6627518	8727296	395.048	0.790555	6899407	7034156	0.980844
10	4306262	2858672	7367602	773.184	0.729387	5373833	5655207	0.950245
10	1684221	4587353	1124793	73.5583	0.231096	259935	261074	0.995637
10	4424327	4400443	1279318	87.2174	0.217894	278756	283352	0.98378
10	851733	2723877	6108452	672.767	0.198397	1211899	1217465	0.995428
10	4378740	3134201	2445375	234.067	0.18916	462568	476798	0.970155
10	245324	3009832	183930	18.3329	0.14785	27194	27477	0.9897
10	835900	3753503	392123	31.3406	0.100892	39562	40437	0.978361
5	303652	1989200	343616	51.8222	0.282269	96992	101728	0.953444
5	999989	2685334	9233002	1031.49	0.228715	2111725	2182437	0.9676
5	318732	6627518	16340903	739.684	0.204774	3346189	3396696	0.985131
5	denovo4581.0	2879979	369569	38.4971	0.193883	71653	73846	0.970303
5	1684221	4587353	2167300	141.735	0.1193	258558	259211	0.997481
