# Supplementary material for: Deconvolute individual genomes from metagenome sequences through short read clustering
Source: PeerJ. 2020 Apr 8;8:e8966. doi: 10.7717/peerj.8966 (PMC7150542; doi:10.7717/peerj.8966)
Supplement: Supplemental Information 3 [file peerj-08-8966-s003.xlsx]

## Sheet: CAMI2_quast_result
Supplemental Table S2: Assembly quality comparison between SpaRC and the classic approach on CAMI2 simulated dataset
Side-by-side comparison of metaQuast metrics. For every reference genome, the first row is SpaRC output, the second row is Classic output
SpaRC is better	Classic is better
genomeId	binId(name with "_final.contig "is SpaRC)	coverage	Reference length	Genome fraction (%)	Total length	Total aligned length	Percent of aligned length	Misassembled contigs length	misassembled/aligned	L50	N50	# misassemblies	# misassembled contigs	# local misassemblies	# indels per 100 kbp	Duplication ratio	# contigs (>= 25000 bp)	L75	Total length (>= 10000 bp)	# mismatches per 100 kbp	# contigs (>= 5000 bp)	Total length (>= 25000 bp)	# scaffold gap loc. mis.	# contigs (>= 0 bp)	Largest contig	# contigs	Unaligned length	# contigs (>= 50000 bp)	Total length (>= 0 bp)	# contigs (>= 10000 bp)	# unaligned mis. contigs	NA75	Total length (>= 5000 bp)	# unaligned contigs	N75	Total length (>= 1000 bp)	NA50	# contigs (>= 1000 bp)	Total length (>= 50000 bp)	Largest alignment	LA75	LA50
851733	bin_8520_final.contigs.fa	717.751	2723745	99.474	13609541	2834319	20.826	397403	14.0211	1039	2171	37	30	11	13.1	1.054	38	3693	3198896	201.41	298	2305694	0	20744	192998	8979	10757497	18	18130401	103	6	-	4521594	8644 + 48 part	863	9469212	-	2892	1593298	192994	-	-
851733	bin.60.fa	717.751	2723745	94.389	2855917	2583076	90.4465	291446	11.2829	42	22859	16	14	7	1.59	1.017	36	79	2497181	51.11	147	1306359	0	170	64757	170	242537	6	2855917	107	0	10473	2767820	0 + 58 part	15533	2855917	18812	170	327665	64402	99	48
135956	bin_2166_final.contigs.fa	538.817	2788611	99.387	3761390	2850037	75.7708	1047287	36.7464	41	21930	77	57	7	7.4	1.048	36	146	2446446	154.25	117	1768904	0	4661	174375	1419	872259	10	4994953	80	3	436	2701555	1061 + 11 part	3367	3047970	17010	276	899965	106629	322	54
135956	bin.103.fa	538.817	2788611	90.993	2738110	2542498	92.8559	685778	26.9726	39	22923	40	33	3	1.58	1.012	32	77	2300767	34.17	140	1214067	0	170	72565	170	174062	6	2738110	97	1	9072	2619277	3 + 57 part	13009	2738110	18492	170	372339	71628	97	44
4378740	bin_3468_final.contigs.fa	481.665	3134147	99.787	7482590	3541879	47.3349	538753	15.2109	65	32447	47	43	42	39.33	1.172	89	155	5776190	836.97	214	4447126	0	6558	119563	2020	3844873	33	9218437	169	10	-	6107546	1138 + 55 part	11873	6464925	-	405	2428466	106567	-	-
4378740	bin.66.fa	481.665	3134147	73.375	2609848	2315867	88.7357	440996	19.0424	81	10619	38	37	1	2.26	1.033	7	155	1441202	93.88	206	217753	0	296	40689	296	238273	0	2609848	94	0	4353	2267354	2 + 85 part	7080	2609848	8783	296	0	26927	201	101
4306262	bin_589_final.contigs.fa	237.716	2858454	97.173	2991737	2790413	93.2707	205294	7.35712	9	101091	10	10	3	0.25	1.009	24	18	2692091	34.42	36	2590047	0	1879	271043	397	197574	21	3553128	30	0	62632	2739159	308 + 0 part	63395	2789468	101091	68	2449763	271043	18	9
4306262	bin.65.fa	237.716	2858454	90.952	2650650	2578453	97.2763	274027	10.6276	17	52399	9	8	1	0.12	1.009	40	36	2547766	19.69	80	2096844	0	81	125267	81	57645	17	2650650	67	0	23872	2645671	0 + 16 part	26586	2650650	49311	81	1352519	114035	40	18
999989	bin_6500_final.contigs.fa	236.457	2684937	98.936	3717449	2821041	75.8865	425424	15.0804	61	13813	115	94	7	18.67	1.102	28	369	2021469	481.07	113	1254721	0	4923	142416	1814	794018	6	4914903	74	8	290	2303036	1154 + 27 part	978	2775566	12788	356	519724	142338	605	64
999989	bin.39.fa	236.457	2684937	76.95	2273362	2079772	91.4844	264104	12.6987	57	12688	29	26	1	3.73	1.023	12	114	1447170	92.3	168	375698	0	231	45048	231	160401	0	2273362	84	0	5356	2047139	0 + 61 part	7635	2273362	10659	231	0	44915	141	67
463794	bin_7279_final.contigs.fa	219.952	2058319	80.774	2461419	1905499	77.4147	266781	14.0006	162	3061	116	106	28	120.35	1.32	1	683	495375	1860.65	102	25678	0	5255	25678	1737	497065	0	3804068	32	4	430	998329	742 + 12 part	714	1606279	2725	386	0	25371	883	175
463794	bin.90.fa	219.952	2058319	61.54	1469158	1264340	86.0588	212923	16.8406	71	7108	33	29	15	39.55	1.057	0	137	399882	642.31	115	0	0	245	22620	245	179137	0	1469158	31	2	2914	999365	2 + 69 part	4425	1469158	4836	245	0	17499	185	90
171232	bin_7279_final.contigs.fa	210.59	2059242	76.565	2461419	1883522	76.5218	485210	25.7608	162	3061	193	171	20	97.61	1.282	1	683	495375	1603.77	102	25678	0	5255	25678	1737	507302	0	3804068	32	2	286	998329	753 + 15 part	714	1606279	2513	386	0	23736	980	191
171232	bin.90.fa	210.59	2059242	60.145	1469158	1250817	85.1384	495236	39.593	71	7108	96	74	7	60.8	1.056	0	137	399882	777.45	115	0	0	245	22620	245	185776	0	1469158	31	3	2422	999365	4 + 68 part	4425	1469158	4378	245	0	21761	212	102
174573	bin_6500_final.contigs.fa	175.473	2112364	0.339	3717449	13360	0.359386	0	0	61	13813	0	0	0	320.96	2.151	28	369	2021469	7200.67	113	1254721	0	4923	142416	1814	3702036	6	4914903	74	2	-	2303036	1789 + 12 part	978	2775566	-	356	519724	1789	-	-
174573	bin.18.fa	175.473	2112364	82.737	1823746	1752793	96.1095	388809	22.1823	38	17168	26	26	0	0.69	1.012	12	71	1367976	35.25	120	387460	0	144	57065	144	55131	1	1823746	71	0	8343	1725738	0 + 21 part	10256	1823746	15070	144	57065	56617	81	41
47365	bin_8520_final.contigs.fa	157.809	2354088	86.007	13609541	2081993	15.298	49914	2.39741	1039	2171	12	12	7	27.86	1.063	38	3693	3198896	410.88	298	2305694	0	20744	192998	8979	11500540	18	18130401	103	9	-	4521594	8255 + 48 part	863	9469212	-	2892	1593298	24863	-	-
47365	bin.76.fa	157.809	2354088	73.547	1860134	1739167	93.4969	102244	5.87891	42	13664	6	6	3	12.3	1.025	11	85	1263645	203.66	123	380390	0	181	59998	181	96458	2	1860134	70	0	6825	1652405	6 + 29 part	8126	1860134	12484	181	119094	59998	96	46
169106	bin_1486_final.contigs.fa	157.63	2188880	98.582	3342431	2173846	65.0379	200839	9.23888	53	15639	12	12	5	4.54	1.018	38	202	1911433	94.21	120	1368999	0	5058	63216	1479	1162363	4	4715266	71	1	-	2271942	1286 + 1 part	1451	2587417	14479	269	219807	62845	-	56
169106	bin.24.fa	157.63	2188880	92.153	2134199	2020615	94.6779	120914	5.98402	33	23318	8	8	1	0.59	1.012	28	65	1737231	48.48	115	963317	0	146	50211	146	95294	1	2134199	77	0	11040	2017153	5 + 19 part	12242	2134199	21212	146	50211	48977	72	35
4.37874e+06	bin_3468_final.contigs.fa	155.766	3222824	99.34	7482590	3395369	45.3769	566678	16.6897	65	32447	47	40	9	20.12	1.08	89	155	5776190	424.76	214	4447126	0	6558	119563	2020	4028159	33	9218437	169	13	-	6107546	1460 + 57 part	11873	6464925	-	405	2428466	110676	-	-
4.37874e+06	bin.47.fa	155.766	3222824	80.642	2821112	2613225	92.631	352473	13.488	66	14694	22	21	1	1.27	1.022	14	126	2034203	67.91	196	427710	0	252	40014	252	168673	0	2821112	117	0	6945	2617189	0 + 63 part	9204	2821112	12129	252	0	33725	149	75
318732	bin_7547_final.contigs.fa	153.348	6626223	98.944	8835325	6911225	78.2226	2261710	32.7252	264	7191	293	226	19	14.17	1.082	41	983	3678569	428.25	377	1610993	0	10213	68785	4247	1754143	8	11149697	174	9	668	5103970	2492 + 95 part	1234	6874089	6011	1208	462784	56953	1342	318
318732	bin.89.fa	153.348	6626223	68.201	4931664	4533510	91.9266	1272856	28.0766	201	7948	198	158	4	2.01	1.03	6	394	1794975	79.53	394	174904	0	731	37542	731	284710	0	4931664	124	2	3398	3703310	0 + 125 part	5004	4931664	6062	731	0	37269	524	253
4469576	bin_9069_final.contigs.fa	151.553	3540092	98.387	4449863	3657854	82.2015	401499	10.9764	53	20297	30	28	6	17.31	1.074	43	171	2895665	433.1	146	2009839	0	5690	108472	1697	749977	13	5981716	100	0	2808	3239625	1158 + 13 part	3178	3590529	20279	328	990862	108472	184	57
4469576	bin.11.fa	151.553	3540092	59.003	2204677	2095560	95.0507	229559	10.9545	67	10310	27	25	1	2.25	1.023	7	134	1145627	80.81	170	231485	0	259	41575	259	71434	0	2204677	71	0	5374	1869315	0 + 38 part	6698	2204677	9007	259	0	41575	152	74
192222	bin_571_final.contigs.fa	146.596	3553496	99.838	3755076	3558575	94.7671	246087	6.91532	8	158664	2	2	0	1.44	1.005	28	16	3496645	21.48	37	3414479	0	1671	407881	365	192366	21	4249230	33	0	71678	3527912	298 + 2 part	90674	3567053	128884	62	3153543	407881	17	9
192222	bin.97.fa	146.596	3553496	84.435	3135808	3010730	96.0113	201276	6.68529	31	28859	7	7	2	1.13	1.012	40	67	2830788	39.49	136	1818935	0	154	110971	154	101785	10	3135808	103	0	14845	3071459	0 + 31 part	16578	3135808	26860	154	759788	110971	74	34
460611	bin_2317_final.contigs.fa	146.427	4661921	99.457	6725908	5722912	85.0876	1080622	18.8824	84	19944	256	222	244	58.88	1.293	70	545	4148833	1217.31	185	3062122	0	8194	121291	3081	820933	17	8688923	137	9	783	4488507	1224 + 34 part	1035	5091134	18263	590	1161720	121283	673	93
460611	bin.28.fa	146.427	4661921	88.238	4625487	4188160	90.5453	578179	13.8051	127	10380	55	50	50	16.7	1.039	14	275	2378708	297.65	352	615907	0	549	137285	549	358860	3	4625487	133	2	4404	3897409	0 + 134 part	6163	4625487	8021	549	257026	122312	349	156
1684221	bin_4551_final.contigs.fa	141.681	4587315	99.411	5356715	4558391	85.0968	284103	6.23253	27	54136	6	6	0	2.46	1.006	57	62	4410813	35.33	97	3905266	0	5576	249797	1387	795892	32	6960155	86	0	21476	4494602	1247 + 0 part	21838	4586178	53601	152	2946509	249797	65	29
1684221	bin.23.fa	141.681	4587315	98.079	4577815	4504097	98.3897	552718	12.2714	27	60175	12	10	0	1	1.005	65	51	4433647	19.34	112	3859614	0	123	139808	123	59716	34	4577815	98	0	30161	4541353	0 + 12 part	37998	4577815	55817	123	2691182	134960	56	30
4424327	bin_9108_final.contigs.fa	132.211	4400277	98.812	7973410	4388859	55.0437	324682	7.39787	120	9478	15	14	6	3.54	1.015	61	1219	3958671	80.22	151	3066465	0	10932	167389	4253	3569831	23	10557405	117	0	-	4213368	3954 + 13 part	925	5792622	8828	1023	1724390	167388	-	124
4424327	bin.81.fa	132.211	4400277	74.762	3456366	3293520	95.2885	232225	7.05097	67	17040	17	17	6	0.88	1.017	26	136	2470360	68.21	220	906786	0	291	65586	291	125060	3	3456366	123	1	7983	3192468	2 + 51 part	9354	3456366	15165	291	176368	65344	153	72
304047	bin_5500_final.contigs.fa	114.029	4902214	99.115	6503738	5133883	78.9374	184255	3.589	121	13600	44	40	15	31.26	1.101	45	429	3750479	419.38	261	1857354	0	8254	84351	2901	1244097	8	8573797	165	10	870	4449634	1861 + 40 part	1235	4995590	12857	536	543273	84351	458	123
304047	bin.106.fa	114.029	4902214	90.639	4995033	4490740	89.9041	384573	8.56369	92	17894	18	18	11	6.55	1.022	40	181	3872681	163.14	313	1413803	0	379	69315	379	457098	3	4995033	193	3	7481	4741293	1 + 124 part	10968	4995033	14865	379	188968	50456	223	108
4449518	bin_7334_final.contigs.fa	113.482	3734239	97.406	6368967	4032088	63.3084	161415	4.00326	202	5198	24	23	20	38.35	1.153	39	1023	2604252	1014.11	207	1333057	0	6913	59677	3320	2229882	4	7751648	122	6	-	3212305	2363 + 90 part	1069	4896728	4693	1139	229517	59677	-	210
4449518	bin.95.fa	113.482	3734239	59.825	2516196	2290244	91.0201	111717	4.87795	114	6542	12	11	5	36.57	1.049	5	238	777494	638.1	172	152943	0	429	36714	429	176511	0	2516196	53	1	3330	1592400	2 + 95 part	4077	2516196	5529	429	0	36703	277	127
4354103	bin_8520_final.contigs.fa	109.622	2301635	90.359	13609541	2127148	15.6298	78009	3.6673	1039	2171	42	35	8	9.91	1.036	38	3693	3198896	143.34	298	2305694	0	20744	192998	8979	11457770	18	18130401	103	13	-	4521594	8004 + 93 part	863	9469212	-	2892	1593298	14708	-	-
4354103	bin.38.fa	109.622	2301635	87.721	2244132	2018691	89.9542	98946	4.90149	52	14074	15	11	2	0.1	1.009	13	103	1515065	20.8	158	420226	0	211	41119	211	209649	0	2244132	84	0	6885	2060458	21 + 17 part	8767	2244132	12863	211	0	40988	114	55
4397402	bin_8520_final.contigs.fa	63.0193	3218280	53.075	13609541	1833685	13.4735	45304	2.47065	1039	2171	36	36	8	38.82	1.11	38	3693	3198896	609.98	298	2305694	0	20744	192998	8979	11716249	18	18130401	103	23	-	4521594	7220 + 93 part	863	9469212	-	2892	1593298	6265	-	-
4397402	bin.35.fa	63.0193	3218280	76.253	2562358	2466388	96.2546	508668	20.624	32	28065	22	19	3	4.56	1.013	39	63	2300366	101.3	118	1476808	0	139	80287	139	76576	4	2562358	93	0	12608	2484223	3 + 23 part	15573	2562358	25588	139	255500	65968	73	37
187233	bin_8520_final.contigs.fa	61.9621	3138674	64.351	13609541	1992960	14.6438	52633	2.64095	1039	2171	28	28	24	67.63	1.148	38	3693	3198896	1012.1	298	2305694	0	20744	192998	8979	11588672	18	18130401	103	11	-	4521594	7408 + 70 part	863	9469212	-	2892	1593298	6557	-	-
187233	bin.26.fa	61.9621	3138674	72.091	2281308	2263336	99.2122	141553	6.25418	35	21543	9	9	14	1.19	1.008	25	70	1866906	56.17	130	920566	0	152	55097	152	5589	3	2281308	84	0	11163	2199291	0 + 5 part	11968	2281308	21105	152	160343	54954	73	36
181719	bin_5500_final.contigs.fa	61.4834	5310990	82.652	6503738	4658829	71.6331	982340	21.0856	121	13600	61	54	34	46.02	1.105	45	429	3750479	944.86	261	1857354	0	8254	84351	2901	1738092	8	8573797	165	24	-	4449634	1870 + 129 part	1235	4995590	10042	536	543273	76588	-	155
181719	bin.106.fa	61.4834	5310990	77.692	4995033	4167292	83.4287	470813	11.2978	92	17894	33	27	22	17.74	1.022	40	181	3872681	607.95	313	1413803	0	379	69315	379	784460	3	4995033	193	6	5268	4741293	4 + 156 part	10968	4995033	12460	379	188968	56624	266	118
197875	bin_120_final.contigs.fa	57.5781	2218229	10.383	292588	233886	79.937	0	0	146	822	0	0	0	3.04	1.023	0	242	0	223.6	0	0	0	641	2029	364	57582	0	400191	0	0	674	0	95 + 0 part	705	57484	818	46	0	2029	244	146
197875	bin.1.fa	57.5781	2218229	94.498	2166731	2097022	96.7828	0	0	17	35718	0	0	2	2.58	1.006	29	37	2028921	38.26	77	1443294	0	87	114863	87	62845	10	2166731	62	0	19254	2131873	0 + 19 part	22757	2166731	30586	87	824146	114863	39	17
835900	bin_688_final.contigs.fa	54.56	3753461	57.807	2634528	2171676	82.4313	6244	0.28752	715	1094	4	4	1	2.07	1.005	0	1437	0	75.58	2	0	0	4343	5972	2447	457913	0	3368965	0	0	777	11069	716 + 1 part	805	1428099	1074	821	0	5972	1456	718
835900	bin.70.fa	54.56	3753461	91.987	3551042	3469691	97.7091	158341	4.56355	47	22642	7	6	1	0.41	1.011	43	99	2926254	36.03	180	1681582	0	228	84814	228	61614	7	3551042	121	0	12482	3368238	1 + 28 part	13047	3551042	21088	228	402509	84745	104	50
192777	bin_9108_final.contigs.fa	51.7753	3254802	62.113	7973410	2028596	25.442	30657	1.51124	120	9478	12	12	1	2.87	1.006	61	1219	3958671	94.82	151	3066465	0	10932	167389	4253	5942219	23	10557405	117	1	-	4213368	2708 + 8 part	925	5792622	-	1023	1724390	5912	-	-
192777	bin.2.fa	51.7753	3254802	91.206	3083845	2985925	96.8247	134437	4.50236	73	14267	11	11	1	0.88	1.015	17	142	2127855	48.41	221	543403	0	291	46180	291	71474	0	3083845	121	0	7295	2829093	5 + 22 part	8567	3083845	13528	291	0	46165	150	75
1108599	bin_7215_final.contigs.fa	50.7384	4628336	67.105	3396282	3111168	91.6051	79657	2.56036	773	1458	30	30	2	0.93	1.004	0	1553	0	75.57	10	0	0	4144	6371	2715	278913	0	3950479	0	0	891	55081	449 + 0 part	901	2234608	1439	1221	0	6371	1581	789
1108599	bin.54.fa	50.7384	4628336	88.523	4225197	4119747	97.5043	494166	11.9951	108	11979	43	40	2	1.49	1.015	20	223	2530445	64.34	302	714420	0	455	64182	455	68054	2	4225197	146	0	6311	3655240	0 + 38 part	7149	4225197	11008	455	117449	56674	242	115
4372003	bin_6661_final.contigs.fa	50.6183	6741337	75.346	6439284	5133412	79.7202	36318	0.707483	1281	1510	17	17	4	6.3	1.026	0	2779	13134	184.63	47	0	0	10009	13134	5263	1262553	0	8290135	1	1	791	295260	1943 + 11 part	848	4153235	1499	2040	0	12780	2840	1288
4372003	bin.36.fa	50.6183	6741337	95.417	6530461	6457322	98.88	576940	8.93466	39	50363	13	11	1	1.18	1.007	92	78	6321181	40.08	174	5300159	0	185	217051	185	51210	40	6530461	152	0	28755	6487725	0 + 27 part	32179	6530461	49303	185	3354864	216933	83	40
164237	bin_2457_final.contigs.fa	50.1979	2944284	74.301	3889576	2408921	61.9327	17501	0.726508	1012	1012	14	13	8	22.86	1.161	0	2160	0	1086.93	18	0	0	7243	9904	3783	1425868	0	5239016	0	2	-	111664	1970 + 30 part	725	1977407	862	1044	0	9904	-	1071
164237	bin.58.fa	50.1979	2944284	87.766	2729866	2618655	95.9261	188307	7.19098	72	12071	13	13	4	4.76	1.028	13	148	1558050	188	206	411093	0	297	40712	297	76267	0	2729866	89	0	5920	2392686	2 + 40 part	6693	2729866	10471	297	0	40396	164	78
245324	bin_7644_final.contigs.fa	46.2169	3009802	4.524	163373	137196	83.9772	0	0	78	911	0	0	3	18.36	1.02	0	126	0	132.21	0	0	0	269	1982	189	24465	0	194860	0	1	774	0	38 + 0 part	801	40832	903	35	0	1982	127	79
245324	bin.69.fa	46.2169	3009802	97.336	2945915	2934098	99.5989	597726	20.3717	9	98207	8	7	2	2.15	1.003	34	21	2906268	21.5	49	2724628	0	51	410434	51	8034	21	2945915	44	0	46559	2938583	0 + 8 part	50061	2945915	72367	51	2245199	410434	24	11
174824	bin_8477_final.contigs.fa	45.8233	4089863	6.992	349903	293568	83.8998	3494	1.19018	170	876	3	3	3	9.09	1.038	0	276	0	357.04	0	0	0	718	1853	418	54041	0	466766	0	0	745	0	90 + 0 part	764	85821	874	74	0	1853	279	171
174824	bin.33.fa	45.8233	4089863	81.223	3474900	3365620	96.8552	245223	7.28612	136	8454	29	29	5	3.88	1.028	5	264	1402528	227.34	293	144414	0	488	32959	488	58980	0	3474900	99	0	4850	2758974	1 + 38 part	5419	3474900	7702	488	0	30864	284	143
182764	bin_8520_final.contigs.fa	44.274	2011339	36.418	13609541	755581	5.55185	15704	2.0784	1039	2171	8	7	5	120.96	1.201	38	3693	3198896	1248.06	298	2305694	0	20744	192998	8979	12827611	18	18130401	103	8	-	4521594	8187 + 71 part	863	9469212	-	2892	1593298	4008	-	-
182764	bin.14.fa	44.274	2011339	90.744	2716385	1838832	67.6941	88217	4.79745	39	21792	5	5	2	4.66	1.015	33	85	2024735	107.83	147	1238117	0	212	71741	212	865265	5	2716385	83	2	-	2486281	79 + 28 part	9649	2716385	12357	212	294815	62626	-	50
3265889	bin_7592_final.contigs.fa	43.0864	2782472	33.562	2780146	935836	33.6614	7820	0.835616	1142	921	3	3	1	13.39	1.034	0	1958	0	272.63	0	0	0	4744	3938	3074	1834387	0	3435995	0	1	-	0	2210 + 3 part	774	1013799	-	748	0	3938	-	-
3265889	bin.7.fa	43.0864	2782472	88.132	2564991	2466209	96.1488	74161	3.00708	30	27153	4	4	3	0.69	1.011	32	63	2168164	63.57	123	1341008	0	150	86897	150	85436	7	2564991	83	0	12208	2469841	2 + 17 part	13701	2564991	24122	150	456417	86897	69	32
1107303	bin_3430_final.contigs.fa	42.1273	3565428	11.024	462634	394409	85.2529	0	0	208	956	0	0	1	0.76	1.005	0	337	0	90.07	0	0	0	771	2388	508	67870	0	565046	0	0	830	0	108 + 0 part	835	180295	954	155	0	2388	337	208
1107303	bin.22.fa	42.1273	3565428	91.736	3310668	3277019	98.9836	266408	8.12958	42	22761	10	10	1	0.73	1.005	35	90	2773501	23.85	173	1495386	0	201	101396	201	24900	8	3310668	115	0	12019	3207067	0 + 14 part	12403	3310668	21353	201	521024	101396	96	45
180944	bin_6305_final.contigs.fa	41.3308	4573762	70.451	5202336	3542009	68.085	68704	1.93969	1357	1102	55	50	76	35.6	1.144	0	2859	0	746.74	18	0	0	8928	8686	5038	1525164	0	6725246	0	7	-	108138	2117 + 42 part	722	2823283	920	1569	0	8499	-	1449
180944	bin.3.fa	41.3308	4573762	74.887	3751220	3491744	93.0829	310193	8.88361	122	9741	33	33	80	27.41	1.032	9	244	1820401	515.77	304	291439	0	470	70863	470	216759	1	3751220	116	7	4759	3154288	2 + 74 part	6207	3751220	8234	470	70863	70741	284	136
184966	bin_3085_final.contigs.fa	40.5577	5128746	23.725	2269743	1292223	56.9326	3261	0.252356	967	919	2	2	6	23.42	1.108	0	1636	0	764.13	0	0	0	3827	3113	2554	942786	0	2768561	0	4	-	0	1191 + 16 part	767	812888	775	630	0	3113	-	1070
184966	bin.40.fa	40.5577	5128746	90.895	4904586	4739055	96.625	114730	2.42095	94	16299	7	7	7	8.13	1.026	41	191	3616239	254.17	315	1399717	0	408	53751	408	128783	2	4904586	184	0	8743	4558812	5 + 48 part	9529	4904586	15707	408	107480	53729	202	97
189840	bin_2457_final.contigs.fa	40.4594	3126983	1.836	3889576	66099	1.69939	0	0	1012	1012	0	0	0	64.45	1.257	0	2160	0	1553.71	18	0	0	7243	9904	3783	3817936	0	5239016	0	0	-	111664	3688 + 5 part	725	1977407	-	1044	0	1159	-	-
189840	bin.104.fa	40.4594	3126983	57.66	1894498	1836249	96.9254	30416	1.65642	80	7256	3	3	3	19.86	1.033	2	161	601155	444.7	151	77599	0	294	50336	294	33078	1	1894498	38	0	4381	1372271	2 + 22 part	4783	1894498	6948	294	50336	50336	169	83
190114	bin_7274_final.contigs.fa	38.7402	3247492	35.884	1507283	1169452	77.5868	6838	0.584718	486	1062	5	5	2	1.97	1.009	0	869	0	98.94	0	0	0	2190	4653	1421	333806	0	1807528	0	0	789	0	474 + 1 part	908	911701	1053	639	0	4653	883	489
190114	bin.31.fa	38.7402	3247492	96.735	3153799	3142579	99.6442	79130	2.518	13	70564	2	2	3	0.64	1.003	37	27	3064065	20.91	66	2740118	0	67	291754	67	7854	23	3153799	56	0	45716	3149022	0 + 3 part	45716	3153799	70406	67	2207761	291729	27	13
336277	bin_5357_final.contigs.fa	35.0912	3861016	46.147	2580657	1897511	73.5282	151191	7.96786	786	1058	99	99	11	25.59	1.098	0	1500	0	646	4	0	0	4595	6677	2569	639601	0	3370678	0	2	-	24073	963 + 8 part	754	1428507	1011	920	0	6677	-	822
336277	bin.107.fa	35.0912	3861016	65.385	2658522	2535731	95.3812	947941	37.3833	65	12243	89	67	4	3.45	1.019	12	136	1634153	128.46	192	429586	0	281	71137	281	94255	1	2658522	92	1	5164	2340834	0 + 37 part	7099	2658522	9020	281	71137	33137	185	88
136604	bin_2317_final.contigs.fa	34.6395	4315150	79.708	6725908	4505766	66.9912	2211644	49.0848	84	19944	228	142	356	192.44	1.39	70	545	4148833	3911.4	185	3062122	0	8194	121291	3081	2146917	17	8688923	137	36	-	4488507	1293 + 152 part	1035	5091134	1373	590	1161720	70174	-	397
136604	bin.28.fa	34.6395	4315150	69.304	4625487	3042212	65.7706	764950	25.1445	127	10380	105	85	234	120.14	1.057	14	275	2378708	2359.98	352	615907	0	549	137285	549	1507051	3	4625487	133	63	-	3897409	4 + 257 part	6163	4625487	3749	549	257026	28048	-	310
187223	bin_8946_final.contigs.fa	33.1691	4326490	17.98	1026734	792730	77.2089	25602	3.2296	391	1027	19	19	3	9.26	1.044	0	673	0	297.99	0	0	0	1590	3823	1073	219953	0	1228259	0	1	527	0	306 + 4 part	793	545020	1006	422	0	3475	717	397
187223	bin.108.fa	33.1691	4326490	89.047	3916282	3863971	98.6643	637045	16.4868	38	32473	22	18	9	1.77	1.009	49	81	3468369	67.28	174	2299487	0	191	132830	191	44451	14	3916282	122	0	14181	3856799	0 + 18 part	16494	3916282	30670	191	1035586	111182	89	40
259846	bin_4882_final.contigs.fa	30.805	3061254	2.885	116262	89309	76.817	1632	1.82736	54	899	2	2	0	15.85	1.097	0	91	0	918.27	0	0	0	230	1423	140	24368	0	153139	0	0	428	0	37 + 0 part	683	41991	858	37	0	1423	98	55
259846	bin.88.fa	30.805	3061254	81.441	2609813	2528269	96.8755	55162	2.18181	94	8661	6	6	1	7.62	1.026	5	188	1113688	246.28	216	164162	0	353	40779	353	52017	0	2609813	73	0	5268	2112643	1 + 34 part	5742	2609813	8309	353	0	40723	198	98
162576	bin_7547_final.contigs.fa	30.422	6224391	0.884	8835325	99173	1.12246	2110	2.1276	264	7191	1	1	1	274.55	1.899	41	983	3678569	6809.21	377	1610993	0	10213	68785	4247	8730900	8	11149697	174	4	-	5103970	4129 + 56 part	1234	6874089	-	1208	462784	15985	-	-
162576	bin.114.fa	30.422	6224391	84.327	5376494	5273969	98.0931	174267	3.30429	155	11047	20	18	0	0.93	1.011	20	310	3014294	69.27	401	665122	0	621	84697	621	70001	1	5376494	185	0	6294	4571773	1 + 34 part	6835	5376494	10594	621	84697	79444	325	160
176850	bin_4968_final.contigs.fa	29.3048	2970488	18.181	1145536	562353	49.0908	9437	1.67813	523	869	10	8	5	10.92	1.067	0	895	0	511.06	0	0	0	2275	2718	1384	572159	0	1498465	0	1	-	0	792 + 2 part	679	379922	-	316	0	2718	-	-
176850	bin.53.fa	29.3048	2970488	80.974	2495784	2431498	97.4242	89616	3.68563	109	7531	10	9	2	7.15	1.025	1	212	812128	216.31	201	27165	0	387	27165	387	30672	0	2495784	58	0	4341	1822562	1 + 24 part	4788	2495784	7193	387	0	26779	223	113
4449524	bin_3468_final.contigs.fa	28.0864	3321873	11.484	7482590	543448	7.26283	149060	27.4286	65	32447	19	16	13	285.2	1.566	89	155	5776190	6684.56	214	4447126	0	6558	119563	2020	6901108	33	9218437	169	24	-	6107546	1466 + 117 part	11873	6464925	-	405	2428466	20323	-	-
4449524	bin.25.fa	28.0864	3321873	43.454	1475060	1448834	98.222	46901	3.23715	87	5507	10	8	0	3.12	1.017	0	167	265867	151.85	98	0	0	282	24418	282	7539	0	1475060	19	0	3671	798334	0 + 11 part	3938	1475060	5247	282	0	23803	173	89
340139	bin_9069_final.contigs.fa	27.6218	4223124	0.959	4449863	68616	1.54198	8899	12.9693	53	20297	1	1	0	363.15	1.932	43	171	2895665	5642.43	146	2009839	0	5690	108472	1697	4373241	13	5981716	100	0	-	3239625	1601 + 24 part	3178	3590529	-	328	990862	4084	-	-
340139	bin.10.fa	27.6218	4223124	89.513	3871966	3795413	98.0229	545485	14.3722	44	23755	18	18	3	4.13	1.01	38	97	3268448	101.61	183	1794307	0	241	99169	241	65645	12	3871966	128	0	12573	3661786	6 + 21 part	12847	3871966	22773	241	844855	86488	105	49
192316	bin_3394_final.contigs.fa	27.391	2345883	1.577	40912	37596	91.8948	2474	6.58049	26	700	3	3	0	8.11	1.019	0	42	0	589.32	0	0	0	80	1069	60	3218	0	49034	0	0	542	0	5 + 0 part	604	1069	663	1	0	1069	44	27
192316	bin.20.fa	27.391	2345883	85.844	2059813	2029651	98.5357	67667	3.33392	57	11551	10	9	0	2.09	1.015	9	113	1181885	107.11	161	273275	0	221	41601	221	14994	0	2059813	70	0	6706	1836951	0 + 13 part	7131	2059813	11207	221	0	41594	118	59
999986	bin_8907_final.contigs.fa	27.3855	2672226	16.629	670870	473494	70.5791	5061	1.06886	280	973	5	5	1	19.35	1.091	0	467	0	764.47	0	0	0	1137	2649	741	186534	0	826664	0	1	-	0	254 + 1 part	779	307524	942	251	0	2649	-	290
999986	bin.80.fa	27.3855	2672226	5.519	2296718	147638	6.42822	3001	2.03267	111	6739	1	1	1	4.07	1.021	0	214	567584	407.52	190	0	0	380	24755	380	2146156	0	2296718	40	1	-	1611492	332 + 15 part	4608	2296718	-	380	0	6256	-	-
175706	bin_3468_final.contigs.fa	25.5841	2328244	2.119	7482590	88016	1.17628	22674	25.7612	65	32447	26	24	0	496.5	2.15	89	155	5776190	13053	214	4447126	0	6558	119563	2020	7381410	33	9218437	169	10	-	6107546	1908 + 18 part	11873	6464925	-	405	2428466	1788	-	-
175706	bin.101.fa	25.5841	2328244	23.082	586058	543637	92.7616	75365	13.8631	53	4036	20	16	6	42.24	1.043	0	92	26098	1097.1	26	0	0	141	13136	141	25679	0	586058	2	0	2801	176311	0 + 18 part	3457	586058	3667	141	0	11293	105	59
187028	bin_3468_final.contigs.fa	25.3899	2364640	0.387	7482590	18594	0.248497	0	0	65	32447	0	0	0	579.49	2.717	89	155	5776190	9304.61	214	4447126	0	6558	119563	2020	7457741	33	9218437	169	1	-	6107546	1977 + 14 part	11873	6464925	-	405	2428466	1335	-	-
187028	bin.52.fa	25.3899	2364640	82.839	1995637	1974372	98.9344	35523	1.79921	55	12779	4	4	0	0.82	1.016	7	102	1336049	85.05	152	206568	0	194	35794	194	6433	0	1995637	84	0	8400	1837619	0 + 8 part	8629	1995637	12357	194	0	35794	104	55
318764	bin_7279_final.contigs.fa	23.5784	1541573	2.139	2461419	47227	1.91869	4875	10.3225	162	3061	7	5	1	603.56	1.761	1	683	495375	4497.89	102	25678	0	5255	25678	1737	2403502	0	3804068	32	4	-	998329	1642 + 26 part	714	1606279	-	386	0	1275	-	-
318764	bin.37.fa	23.5784	1541573	84.767	1364554	1323418	96.9854	70687	5.34125	54	8589	8	7	1	3.06	1.019	1	102	511210	217.18	111	27974	0	192	27974	192	33051	0	1364554	35	0	5145	1071637	8 + 7 part	5530	1364554	8306	192	0	27974	108	56
168984	bin_6305_final.contigs.fa	23.5428	4438133	65.354	5202336	3204841	61.6039	84799	2.64597	1357	1102	62	56	69	54.78	1.15	0	2859	0	1377.98	18	0	0	8928	8686	5038	1877552	0	6725246	0	12	-	108138	2380 + 92 part	722	2823283	783	1569	0	8446	-	1612
168984	bin.3.fa	23.5428	4438133	73.636	3751220	3332312	88.8328	383538	11.5097	122	9741	32	32	49	30.6	1.031	9	244	1820401	886.61	304	291439	0	470	70863	470	384629	1	3751220	116	8	4242	3154288	18 + 90 part	6207	3751220	7822	470	70863	61633	297	140
999986	bin_8907_final.contigs.fa	23.2606	2851590	3.243	670870	99883	14.8886	4329	4.33407	280	973	5	5	0	18.38	1.133	0	467	0	1106.33	0	0	0	1137	2649	741	567461	0	826664	0	2	-	0	609 + 2 part	779	307524	-	251	0	1507	-	-
999986	bin.80.fa	23.2606	2851590	73.506	2296718	2107869	91.7774	50688	2.4047	111	6739	8	8	0	1.43	1.016	0	214	567584	93.75	190	0	0	380	24755	380	168076	0	2296718	40	0	4109	1611492	37 + 17 part	4608	2296718	6410	380	0	24020	224	114
344525	bin_5500_final.contigs.fa	22.5462	6217351	3.007	6503738	293132	4.50713	3117	1.06334	121	13600	4	4	2	690.51	2.215	45	429	3750479	7756.57	261	1857354	0	8254	84351	2901	6149700	8	8573797	165	17	-	4449634	2367 + 91 part	1235	4995590	-	536	543273	5139	-	-
344525	bin.115.fa	22.5462	6217351	56.936	3697412	3571772	96.6019	96576	2.70387	188	6113	11	11	3	5.73	1.023	0	371	969080	280.04	281	0	0	655	21754	655	75987	0	3697412	71	0	3900	2363475	10 + 32 part	4157	3697412	5854	655	0	21340	388	196
4480176	bin_5423_final.contigs.fa	22.1002	3050613	3.087	329423	95254	28.9154	5628	5.90841	157	774	6	6	0	46.73	1.034	0	273	0	604.26	0	0	0	717	2112	418	233203	0	447731	0	0	-	0	303 + 1 part	646	87823	-	69	0	1755	-	-
4480176	bin.21.fa	22.1002	3050613	69.348	2130278	2116989	99.3762	247782	11.7045	15	37954	8	7	2	2.13	1.006	26	34	1961238	71.28	76	1422226	0	83	117290	83	8070	10	2130278	58	0	18985	2107384	0 + 1 part	20384	2130278	37778	83	877562	109220	36	15
1992	bin_5500_final.contigs.fa	22.0067	6475296	3.716	6503738	307656	4.73045	4938	1.60504	121	13600	7	7	4	576.91	1.915	45	429	3750479	5852.62	261	1857354	0	8254	84351	2901	6129625	8	8573797	165	20	-	4449634	2342 + 93 part	1235	4995590	-	536	543273	5091	-	-
1992	bin.5.fa	22.0067	6475296	83.105	5667505	5437789	95.9468	52844	0.971792	149	11539	6	6	2	4.92	1.018	23	314	3183872	231.64	400	828260	0	650	54687	650	190914	3	5667505	181	0	6053	4740285	38 + 28 part	6483	5667505	11314	650	158610	54683	323	151
405780	bin_6294_final.contigs.fa	21.1803	3008576	2.148	73990	32167	43.4748	0	0	33	840	0	0	0	17.02	1.002	0	58	0	190.34	0	0	0	152	3163	90	41800	0	99233	0	0	-	0	58 + 0 part	648	20581	-	14	0	3163	-	-
405780	bin.13.fa	21.1803	3008576	90.335	2733608	2725529	99.7045	47408	1.73941	18	47408	1	1	4	0.52	1.004	40	36	2611926	42.53	79	2177129	0	83	130734	83	5717	15	2733608	65	0	28383	2718432	0 + 3 part	29498	2733608	45477	83	1250796	130734	37	18
194490	bin_7334_final.contigs.fa	20.9362	3864643	40.401	6368967	1927525	30.2643	67997	3.52768	202	5198	19	14	15	103.37	1.265	39	1023	2604252	2511.4	207	1333057	0	6913	59677	3320	4408536	4	7751648	122	40	-	3212305	1872 + 180 part	1069	4896728	-	1139	229517	23564	-	-
194490	bin.67.fa	20.9362	3864643	36.032	1416765	1397622	98.6488	16089	1.15117	72	5819	2	2	1	1.94	1.015	2	149	335138	132.28	95	56646	0	261	28340	261	2946	0	1416765	21	0	3737	830805	0 + 4 part	3894	1416765	5566	261	0	28306	153	74
134065	bin_6305_final.contigs.fa	20.6498	3715149	1.068	5202336	53421	1.02687	0	0	1357	1102	0	0	1	209.16	1.705	0	2859	0	4883.83	18	0	0	8928	8686	5038	5134687	0	6725246	0	2	-	108138	4919 + 30 part	722	2823283	-	1569	0	1240	-	-
134065	bin.30.fa	20.6498	3715149	67.07	2681165	2528232	94.296	53500	2.1161	141	6069	9	8	7	13.89	1.025	2	279	566130	436.64	195	63234	0	486	34681	486	128162	0	2681165	39	0	3736	1641085	21 + 33 part	4014	2681165	5846	486	0	34681	294	146
180972	bin_6305_final.contigs.fa	20.2846	4699139	10.631	5202336	611934	11.7627	1124	0.18368	1357	1102	1	1	10	129.71	1.359	0	2859	0	2414.49	18	0	0	8928	8686	5038	4524878	0	6725246	0	7	-	108138	4107 + 137 part	722	2823283	-	1569	0	3174	-	-
180972	bin.48.fa	20.2846	4699139	76.265	3812008	3620670	94.9807	273220	7.54612	136	8739	23	20	11	5.61	1.019	6	283	1632318	206.85	282	205667	0	549	53716	549	160320	1	3812008	106	0	4383	2857704	23 + 30 part	4972	3812008	8060	549	53716	43295	309	148
831178	bin_4551_final.contigs.fa	19.4071	5365184	0.188	5356715	10450	0.195082	0	0	27	54136	0	0	0	99.07	1.179	57	62	4410813	812.36	97	3905266	0	5576	249797	1387	5344812	32	6960155	86	0	-	4494602	1368 + 0 part	21838	4586178	-	152	2946509	782	-	-
831178	bin.51.fa	19.4071	5365184	82.339	4514590	4451607	98.6049	124110	2.78798	189	7730	15	12	1	0.14	1.017	3	373	1572416	96.05	354	83356	0	693	32329	693	22480	0	4514590	111	0	4575	3293316	0 + 23 part	4824	4514590	7445	693	0	32301	386	194
175613	bin_6305_final.contigs.fa	19.229	4733908	11.543	5202336	665369	12.7898	7246	1.08902	1357	1102	6	6	8	129.57	1.332	0	2859	0	2272.38	18	0	0	8928	8686	5038	4475275	0	6725246	0	17	-	108138	4040 + 144 part	722	2823283	-	1569	0	4148	-	-
175613	bin.50.fa	19.229	4733908	70.168	3409321	3350673	98.2798	164063	4.89642	137	7821	17	17	7	5.84	1.017	1	279	1221178	237.08	261	33041	0	523	33041	523	32111	0	3409321	81	0	4442	2470902	0 + 23 part	4733	3409321	7650	523	0	33030	291	142
4394913	bin_3468_final.contigs.fa	18.3598	3715661	0.062	7482590	2096	0.0280117	0	0	65	32447	0	0	0	218.15	1.001	89	155	5776190	2443.28	214	4447126	0	6558	119563	2020	7480494	33	9218437	169	1	-	6107546	2015 + 2 part	11873	6464925	-	405	2428466	657	-	-
4394913	bin.45.fa	18.3598	3715661	77.706	2945101	2909622	98.7953	10352	0.355785	124	7646	2	2	1	0.28	1.017	4	245	1027998	100.65	241	113430	0	446	32100	446	7966	0	2945101	72	0	4801	2192428	0 + 8 part	4973	2945101	7493	446	0	31970	250	126
181719	bin_5500_final.contigs.fa	17.7352	4916921	2.639	6503738	202151	3.10823	524	0.259212	121	13600	1	1	4	408.52	2.05	45	429	3750479	5665.35	261	1857354	0	8254	84351	2901	6238877	8	8573797	165	15	-	4449634	2476 + 82 part	1235	4995590	-	536	543273	5097	-	-
181719	bin.68.fa	17.7352	4916921	23.676	1850101	1169644	63.2205	60146	5.14225	97	5615	5	5	1	6.61	1.015	1	196	445703	258.64	130	27096	0	342	27096	342	668457	0	1850101	30	0	-	1102654	88 + 6 part	3918	1850101	3346	342	0	18391	-	168
1108453	bin_2317_final.contigs.fa	17.5932	3642422	0.936	6725908	52195	0.776029	8108	15.5341	84	19944	3	3	5	134.86	1.872	70	545	4148833	4775.87	185	3062122	0	8194	121291	3081	6662531	17	8688923	137	4	-	4488507	2988 + 24 part	1035	5091134	-	590	1161720	2318	-	-
1108453	bin.9.fa	17.5932	3642422	90.736	3417314	3341498	97.7814	175064	5.23909	93	12406	16	15	5	1.09	1.015	14	182	2081527	148.78	251	432133	0	362	48289	362	63269	0	3417314	126	0	7112	3007641	9 + 19 part	7386	3417314	11745	362	0	48289	188	95
179616	bin_6661_final.contigs.fa	17.3886	3232117	0.916	6439284	30473	0.473236	0	0	1281	1510	0	0	1	87.82	1.065	0	2779	13134	962.64	47	0	0	10009	13134	5263	6407765	0	8290135	1	0	-	295260	5202 + 15 part	848	4153235	-	2040	0	1612	-	-
179616	bin.55.fa	17.3886	3232117	62.47	2074216	2031189	97.9256	76351	3.75893	110	6623	12	10	4	2.62	1.017	0	205	416596	120.7	176	0	0	356	22101	356	22458	0	2074216	33	0	4302	1420113	3 + 13 part	4561	2074216	6301	356	0	22096	213	114
2897325	bin_4551_final.contigs.fa	17.2469	3544254	0.26	5356715	9636	0.179886	0	0	27	54136	0	0	0	0	1.143	57	62	4410813	1401.11	97	3905266	0	5576	249797	1387	5346188	32	6960155	86	0	-	4494602	1371 + 3 part	21838	4586178	-	152	2946509	1374	-	-
2897325	bin.6.fa	17.2469	3544254	68.18	2472629	2432495	98.3769	10446	0.429436	143	6032	3	3	1	0.25	1.019	0	268	420788	100.23	197	0	0	453	19012	453	11312	0	2472629	33	0	4092	1531190	0 + 9 part	4191	2472629	5810	453	0	18944	274	146
1111580	bin_8520_final.contigs.fa	16.6015	3177761	0.617	13609541	20243	0.148741	0	0	1039	2171	0	0	0	96.84	1.1	38	3693	3198896	897.04	298	2305694	0	20744	192998	8979	13587967	18	18130401	103	0	-	4521594	8945 + 2 part	863	9469212	-	2892	1593298	1097	-	-
1111580	bin.82.fa	16.6015	3177761	89.379	2898379	2876055	99.2298	46504	1.61694	89	10679	6	6	1	0.42	1.017	6	178	1542651	136.82	221	168756	0	347	30845	347	10357	0	2898379	98	0	6224	2424104	1 + 6 part	6371	2898379	10601	347	0	30602	181	90
4476780	bin_7334_final.contigs.fa	16.5282	2869812	20.016	6368967	634778	9.96673	819	0.129021	202	5198	1	1	0	54.84	1.129	39	1023	2604252	1611.36	207	1333057	0	6913	59677	3320	5720774	4	7751648	122	13	-	3212305	2575 + 111 part	1069	4896728	-	1139	229517	4064	-	-
4476780	bin.85.fa	16.5282	2869812	14.998	440456	430814	97.8109	12587	2.92168	42	4095	6	4	1	4.65	1.021	0	72	0	193.76	23	0	0	110	9606	110	1238	0	440456	0	0	3039	137252	0 + 1 part	3330	440456	4093	110	0	9590	74	42
260756	bin_5423_final.contigs.fa	16.0272	5622435	2.242	329423	130490	39.6117	18779	14.3911	157	774	17	16	2	50.77	1.131	0	273	0	1411.26	0	0	0	717	2112	418	194010	0	447731	0	0	-	0	250 + 1 part	646	87823	-	69	0	1826	-	-
260756	bin.71.fa	16.0272	5622435	50.72	2883254	2868504	99.4884	546834	19.0634	49	18990	34	28	3	3.3	1.011	28	102	2227818	147.74	167	988553	0	230	61961	230	5857	3	2883254	108	0	9733	2646007	0 + 6 part	10333	2883254	17487	230	172354	58752	112	55
276484	bin_5500_final.contigs.fa	15.9103	4652458	3.953	6503738	267607	4.11466	3360	1.25557	121	13600	5	5	2	329.49	1.811	45	429	3750479	4485.62	261	1857354	0	8254	84351	2901	6171706	8	8573797	165	13	-	4449634	2387 + 78 part	1235	4995590	-	536	543273	5200	-	-
276484	bin.102.fa	15.9103	4652458	78.283	3714775	3671600	98.8377	105190	2.86496	71	14706	6	5	0	1.76	1.011	34	152	2559837	147.66	243	1173296	0	324	56984	324	33332	1	3714775	127	0	8468	3420103	1 + 16 part	8584	3714775	14610	324	56984	56984	155	73
denovo8298.0	bin_8535_final.contigs.fa	15.5018	3554854	2.036	115698	57204	49.4425	3776	6.60094	58	764	3	3	2	107.75	1.166	0	100	0	1621.7	0	0	0	267	2056	152	56258	0	162025	0	1	-	0	75 + 0 part	611	29638	-	24	0	1843	-	-
denovo8298.0	bin.112.fa	15.5018	3554854	46.24	1695472	1652189	97.4471	6179	0.373989	153	3949	2	2	1	1.7	1.018	0	274	48819	167.79	85	0	0	426	13220	426	21722	0	1695472	4	0	2968	552437	0 + 13 part	3128	1695472	3814	426	0	13094	285	159
129394	bin_2317_final.contigs.fa	14.994	3925456	1.399	6725908	81837	1.21674	2272	2.77625	84	19944	4	3	1	243.96	1.847	70	545	4148833	5845.94	185	3062122	0	8194	121291	3081	6625413	17	8688923	137	9	-	4488507	2916 + 53 part	1035	5091134	-	590	1161720	1781	-	-
129394	bin.34.fa	14.994	3925456	79.648	3185867	3157883	99.1216	58238	1.84421	131	7759	5	5	2	1.79	1.015	4	258	1140584	212.66	263	105933	0	465	28953	465	12004	0	3185867	79	0	5061	2418576	1 + 7 part	5146	3185867	7504	465	0	28827	264	135
3919797	bin_9069_final.contigs.fa	14.7447	5466970	3.196	4449863	303253	6.81488	27375	9.02712	53	20297	9	8	8	290.13	1.891	43	171	2895665	5513.69	146	2009839	0	5690	108472	1697	4127213	13	5981716	100	14	-	3239625	1415 + 64 part	3178	3590529	-	328	990862	10688	-	-
3919797	bin.62.fa	14.7447	5466970	58.82	3424321	3278855	95.752	188473	5.74813	177	5939	25	22	12	10.2	1.037	2	353	826681	492.9	247	77988	0	619	52936	619	94087	1	3424321	58	0	3543	2098117	5 + 47 part	3986	3424321	5544	619	52936	52932	386	190
354913	bin_8520_final.contigs.fa	14.3972	1790038	3.084	13609541	67149	0.493397	3487	5.19293	1039	2171	3	3	3	403.94	1.335	38	3693	3198896	2246.13	298	2305694	0	20744	192998	8979	13536083	18	18130401	103	9	-	4521594	8860 + 16 part	863	9469212	-	2892	1593298	1195	-	-
354913	bin.27.fa	14.3972	1790038	42.994	786736	772405	98.1784	0	0	75	3958	0	0	0	2.6	1.019	0	132	10427	178.92	32	0	0	202	10427	202	2700	0	786736	1	0	3011	204609	0 + 4 part	3117	786736	3897	202	0	10421	134	76
831301	bin_4686_final.contigs.fa	14.3666	2127510	1.505	90615	30841	34.0352	1237	4.01089	50	715	2	2	1	31.24	1.091	0	85	0	749.74	0	0	0	205	1452	125	58066	0	123802	0	0	-	0	81 + 0 part	614	12913	-	11	0	1452	-	-
831301	bin.57.fa	14.3666	2127510	92.178	1995378	1980311	99.2449	113844	5.74879	56	11540	13	11	1	4.74	1.017	7	110	1187894	186.68	154	216348	0	219	47072	219	3171	0	1995378	73	0	6674	1757809	0 + 4 part	7074	1995378	11276	219	0	47033	115	58
178480	bin_4968_final.contigs.fa	14.0121	4070332	2.018	1145536	87119	7.60509	3299	3.78677	523	869	5	5	0	31.66	1.116	0	895	0	1396.52	0	0	0	2275	2718	1384	1055330	0	1498465	0	0	-	0	1260 + 0 part	679	379922	-	316	0	1395	-	-
178480	bin.17.fa	14.0121	4070332	40.688	1683652	1664170	98.8429	62922	3.78098	125	4919	10	10	1	0.54	1.015	0	222	111691	171.06	120	0	0	355	13982	355	3483	0	1683652	10	0	3661	821837	0 + 4 part	3844	1683652	4836	355	0	12509	229	128
263687	bin_2317_final.contigs.fa	14.0014	3659825	0.959	6725908	58886	0.87551	877	1.48932	84	19944	1	1	4	333.26	1.94	70	545	4148833	7032.59	185	3062122	0	8194	121291	3081	6657871	17	8688923	137	1	-	4488507	2980 + 20 part	1035	5091134	-	590	1161720	2224	-	-
263687	bin.42.fa	14.0014	3659825	39.479	1499541	1450438	96.7255	35137	2.42251	146	3880	7	7	0	2.15	1.019	0	254	23755	235.66	55	0	0	385	13692	385	29636	0	1499541	2	0	3081	354494	8 + 5 part	3175	1499541	3710	385	0	13679	261	150
312322	bin_3468_final.contigs.fa	13.4169	2340070	0.352	7482590	18025	0.240893	0	0	65	32447	0	0	0	582.81	3.246	89	155	5776190	13307.4	214	4447126	0	6558	119563	2020	7456222	33	9218437	169	4	-	6107546	1977 + 12 part	11873	6464925	-	405	2428466	1326	-	-
312322	bin.101.fa	13.4169	2340070	17.372	586058	411241	70.1707	77538	18.8546	53	4036	19	16	6	194.34	1.052	0	92	26098	5808.73	26	0	0	141	13136	141	158300	0	586058	2	6	-	176311	9 + 52 part	3457	586058	2782	141	0	7057	-	77
4405128	bin_8520_final.contigs.fa	13.1244	3782950	0.236	13609541	8487	0.0623607	0	0	1039	2171	0	0	0	302.08	1.269	38	3693	3198896	2383.08	298	2305694	0	20744	192998	8979	13598971	18	18130401	103	0	-	4521594	8961 + 1 part	863	9469212	-	2892	1593298	800	-	-
4405128	bin.61.fa	13.1244	3782950	25.858	994586	980004	98.5339	0	0	101	3624	0	0	0	0.2	1.014	0	175	21798	159.17	39	0	0	263	11396	263	2712	0	994586	2	0	3040	241650	0 + 3 part	3122	994586	3593	263	0	11370	178	102
4440624	bin_2317_final.contigs.fa	12.9967	3270570	0.724	6725908	34106	0.507084	1311	3.8439	84	19944	1	1	0	139.43	1.66	70	545	4148833	4761.7	185	3062122	0	8194	121291	3081	6686616	17	8688923	137	1	-	4488507	3013 + 16 part	1035	5091134	-	590	1161720	1594	-	-
4440624	bin.49.fa	12.9967	3270570	23.256	778949	762665	97.9095	0	0	66	4365	0	0	0	5.65	1.011	0	116	45406	279.65	41	0	0	180	12271	180	9867	0	778949	4	0	3432	276079	3 + 1 part	3499	778949	4313	180	0	12148	117	67
233991	bin_9108_final.contigs.fa	12.8413	3885459	1.099	7973410	44897	0.563084	0	0	120	9478	0	0	1	168.57	1.156	61	1219	3958671	1699.8	151	3066465	0	10932	167389	4253	7924019	23	10557405	117	8	-	4213368	4160 + 27 part	925	5792622	-	1023	1724390	1121	-	-
233991	bin.64.fa	12.8413	3885459	61.434	2434113	2404563	98.786	0	0	164	5015	0	0	1	1.17	1.015	0	306	264872	239.21	164	0	0	501	18906	501	11462	0	2434113	22	0	3684	1218578	1 + 6 part	3755	2434113	4886	501	0	18906	311	166
173916	bin_7547_final.contigs.fa	12.4399	7250331	0.578	8835325	54212	0.613582	511	0.942596	264	7191	1	1	1	269.49	1.525	41	983	3678569	5747.54	377	1610993	0	10213	68785	4247	8777809	8	11149697	174	2	-	5103970	4168 + 33 part	1234	6874089	-	1208	462784	9131	-	-
173916	bin.44.fa	12.4399	7250331	71.093	5326340	5222712	98.0544	70391	1.34779	313	5784	14	14	3	5.28	1.021	1	592	795647	312.83	417	29207	0	1012	29207	1012	64809	0	5326340	62	0	3802	3228205	9 + 6 part	3930	5326340	5693	1012	0	19994	609	321
4417539	bin_4968_final.contigs.fa	12.4026	2402818	1.376	1145536	32961	2.87734	5017	15.221	523	869	6	6	0	30.26	1.077	0	895	0	1025.69	0	0	0	2275	2718	1384	1112004	0	1498465	0	0	-	0	1338 + 2 part	679	379922	-	316	0	1339	-	-
4417539	bin.94.fa	12.4026	2402818	29.785	725035	716182	98.779	14788	2.06484	79	3577	4	4	0	1.68	1.011	0	135	0	194.22	22	0	0	201	7511	201	2227	0	725035	0	0	2916	128018	0 + 2 part	2956	725035	3439	201	0	7507	139	81
228730	bin_3468_final.contigs.fa	12.3457	2372492	1.721	7482590	103791	1.3871	545	0.525094	65	32447	1	1	2	578.09	2.955	89	155	5776190	15951.4	214	4447126	0	6558	119563	2020	7365079	33	9218437	169	3	-	6107546	1871 + 22 part	11873	6464925	-	405	2428466	5112	-	-
228730	bin.101.fa	12.3457	2372492	22.514	586058	538790	91.9346	44875	8.32885	53	4036	11	11	9	49.8	1.037	0	92	26098	1189.76	26	0	0	141	13136	141	33970	0	586058	2	2	2808	176311	2 + 16 part	3457	586058	3709	141	0	12758	103	58
190026	bin_688_final.contigs.fa	12.2479	5047836	0.69	2634528	35126	1.33329	2491	7.09161	715	1094	3	3	1	25.83	1.013	0	1437	0	1113.41	2	0	0	4343	5972	2447	2599228	0	3368965	0	0	-	11069	2393 + 3 part	805	1428099	-	821	0	1388	-	-
190026	bin.110.fa	12.2479	5047836	35.638	1837820	1804453	98.1844	6716	0.37219	178	3913	2	2	0	0.56	1.015	0	309	21237	183.05	78	0	0	474	11050	474	12669	0	1837820	2	0	2998	486462	0 + 13 part	3129	1837820	3800	474	0	11030	317	181
denovo2280.0	bin_8520_final.contigs.fa	12.1541	1796948	2.096	13609541	63617	0.467444	9706	15.2569	1039	2171	13	13	4	454.01	2.017	38	3693	3198896	5671.2	298	2305694	0	20744	192998	8979	13534040	18	18130401	103	14	-	4521594	8848 + 44 part	863	9469212	-	2892	1593298	1739	-	-
denovo2280.0	bin.8.fa	12.1541	1796948	76.564	1392115	1387583	99.6745	20515	1.47847	61	7323	3	3	1	0.15	1.01	1	119	470146	213.04	124	26844	0	210	26844	210	2029	0	1392115	34	0	5016	1070458	0 + 2 part	5079	1392115	7148	210	0	26837	120	62
14094	bin_2457_final.contigs.fa	11.5873	4380675	2.199	3889576	101349	2.60566	10587	10.4461	1012	1012	14	14	1	57.1	1.133	0	2160	0	1318.44	18	0	0	7243	9904	3783	3782081	0	5239016	0	1	-	111664	3620 + 12 part	725	1977407	-	1044	0	1252	-	-
14094	bin.113.fa	11.5873	4380675	21.166	955654	927746	97.0797	28717	3.09535	111	3408	9	6	0	1.4	1.013	0	187	0	216.46	18	0	0	275	8174	275	15995	0	955654	0	0	2776	111182	2 + 7 part	2871	955654	3258	275	0	8053	195	115
463794	bin_8520_final.contigs.fa	11.4766	2316479	5.078	13609541	120674	0.886687	6937	5.74855	1039	2171	6	6	2	598.52	2.246	38	3693	3198896	6987.52	298	2305694	0	20744	192998	8979	13472014	18	18130401	103	13	-	4521594	8758 + 60 part	863	9469212	-	2892	1593298	1702	-	-
463794	bin.73.fa	11.4766	2316479	68.439	1898652	1594873	84.0003	12092	0.758179	115	5648	2	2	0	2.71	1.015	1	216	285222	348.75	140	28460	0	366	28460	366	298393	0	1898652	21	1	3065	1086202	41 + 8 part	3961	1898652	4768	366	0	16691	258	135
4340358	bin_5500_final.contigs.fa	11.1803	5491300	79.702	6503738	4636237	71.2857	1559406	33.6352	121	13600	161	128	30	44.07	1.103	45	429	3750479	1018.2	261	1857354	0	8254	84351	2901	1736683	8	8573797	165	27	-	4449634	1869 + 125 part	1235	4995590	8759	536	543273	61846	-	173
4340358	bin.106.fa	11.1803	5491300	73.723	4995033	4077641	81.6339	1066472	26.1541	92	17894	76	60	24	24.06	1.023	40	181	3872681	733.14	313	1413803	0	379	69315	379	869839	3	4995033	193	15	4181	4741293	4 + 160 part	10968	4995033	11314	379	188968	56624	304	132
4334624	bin_9108_final.contigs.fa	10.8808	3619905	2.261	7973410	82344	1.03273	0	0	120	9478	0	0	0	321.35	1.197	61	1219	3958671	2964.21	151	3066465	0	10932	167389	4253	7885249	23	10557405	117	4	-	4213368	4100 + 34 part	925	5792622	-	1023	1724390	1935	-	-
4334624	bin.105.fa	10.8808	3619905	21.549	791470	781169	98.6985	13239	1.69477	73	4046	3	3	0	2.31	1.009	0	128	0	294.22	36	0	0	196	8883	196	4453	0	791470	0	0	3163	230597	0 + 6 part	3262	791470	3959	196	0	8793	131	75
269378	bin_7274_final.contigs.fa	10.6048	3006252	1.547	1507283	51093	3.38974	3520	6.8894	486	1062	5	5	0	77.4	1.176	0	869	0	1769.55	0	0	0	2190	4653	1421	1453242	0	1807528	0	1	-	0	1342 + 2 part	908	911701	-	639	0	1456	-	-
269378	bin.78.fa	10.6048	3006252	37.254	1137975	1126753	99.0139	0	0	91	4423	0	0	6	7.05	1.011	0	166	40090	468.68	64	0	0	263	16020	263	6157	0	1137975	3	0	3310	445719	0 + 6 part	3351	1137975	4408	263	0	16020	168	92
134065	bin_2457_final.contigs.fa	10.5059	3477404	0.557	3889576	22541	0.579523	677	3.00342	1012	1012	1	1	0	41.32	1.29	0	2160	0	1632.15	18	0	0	7243	9904	3783	3864602	0	5239016	0	1	-	111664	3740 + 7 part	725	1977407	-	1044	0	877	-	-
134065	bin.109.fa	10.5059	3477404	42.216	1611451	1477891	91.7118	26572	1.79797	140	4272	4	4	0	1.98	1.013	0	251	11405	367.44	87	0	0	392	11405	392	124359	0	1611451	1	0	3072	565385	33 + 1 part	3268	1611451	3953	392	0	9746	263	146
4402042	bin_8520_final.contigs.fa	10.4451	6628476	1.056	13609541	69935	0.513867	0	0	1039	2171	0	0	0	2.86	1	38	3693	3198896	582.85	298	2305694	0	20744	192998	8979	13539535	18	18130401	103	0	-	4521594	8872 + 0 part	863	9469212	-	2892	1593298	1193	-	-
4402042	bin.56.fa	10.4451	6628476	36.839	2532861	2451954	96.8057	75138	3.06441	241	3961	16	14	5	0.7	1.013	0	422	0	336.54	111	0	0	645	9301	645	60623	0	2532861	0	0	3028	691426	16 + 2 part	3143	2532861	3841	645	0	9293	435	248
259511	bin_7547_final.contigs.fa	10.3699	5820140	1.97	8835325	207993	2.35411	20822	10.0109	264	7191	6	6	11	354.12	2.006	41	983	3678569	8462.28	377	1610993	0	10213	68785	4247	8609751	8	11149697	174	16	-	5103970	4005 + 67 part	1234	6874089	-	1208	462784	8073	-	-
259511	bin.62.fa	10.3699	5820140	55.271	3424321	3281464	95.8282	198696	6.0551	177	5939	29	27	12	10.44	1.037	2	353	826681	495.05	247	77988	0	619	52936	619	90755	1	3424321	58	0	3535	2098117	4 + 45 part	3986	3424321	5536	619	52936	52932	386	190
denovo8808.0	bin_7547_final.contigs.fa	10.2561	6556988	2.147	8835325	252937	2.86279	29067	11.4918	264	7191	14	13	13	316.8	1.957	41	983	3678569	7692.64	377	1610993	0	10213	68785	4247	8560760	8	11149697	174	16	-	5103970	3938 + 77 part	1234	6874089	-	1208	462784	11095	-	-
denovo8808.0	bin.62.fa	10.2561	6556988	30.875	3424321	2071929	60.5063	539094	26.0189	177	5939	106	92	182	198.52	1.055	2	353	826681	6807.12	247	77988	0	619	52936	619	1291552	1	3424321	58	51	-	2098117	45 + 239 part	3986	3424321	2358	619	52936	16636	-	417
190673	bin_3468_final.contigs.fa	10.1215	2353520	1.493	7482590	86309	1.15346	13138	15.2221	65	32447	3	3	0	859.62	2.916	89	155	5776190	18365	214	4447126	0	6558	119563	2020	7386550	33	9218437	169	3	-	6107546	1925 + 11 part	11873	6464925	-	405	2428466	9062	-	-
190673	bin.101.fa	10.1215	2353520	22.774	586058	535951	91.4502	25791	4.81219	53	4036	7	7	7	54.85	1.037	0	92	26098	1307.3	26	0	0	141	13136	141	36743	0	586058	2	1	2826	176311	0 + 22 part	3457	586058	3644	141	0	12758	103	58
