# Supplementary material for: Deconvolute individual genomes from metagenome sequences through short read clustering
Source: PeerJ. 2020 Apr 8;8:e8966. doi: 10.7717/peerj.8966 (PMC7150542; doi:10.7717/peerj.8966)
Supplement: Supplemental Information 4 [file peerj-08-8966-s004.xlsx]

## Sheet: PurityAndCompleteness_Figure4_d
Supplemental_Table_S3
These results support Figure 4.
dataset	approach	coverage_level	completeness_level(#recovered genome)	recovered genomeId	coverage	genome_comple	OTU_purity	OTU Id	bin Id
CAMI2	Classic	>=100	>=95%(11)	851733	717.751	99.47	99.7	1578	bin.60.fa
				4378740	481.665	97.28	99.2	838	bin.66.fa
				4306262	237.716	99.88	99.03	239934	bin.65.fa
				999989	236.457	97.54	98.65	838	bin.39.fa
				174573	175.473	99.35	98.89	171551	bin.18.fa
				169106	157.63	97.84	99.15	1578	bin.24.fa
				4.37874e+06	155.766	96.76	98.86	838	bin.47.fa
				460611	146.427	98.08	98.82	830	bin.28.fa
				1684221	141.681	99.98	99.4	872	bin.23.fa
				304047	114.029	98.22	98.99	816	bin.106.fa
				4354103	109.622	95.7	99.2	1578	bin.38.fa
			80-95%(8)	135956	538.817	94.93	99.63	1578	bin.103.fa
				463794	219.952	85.1	99.69	1578	bin.90.fa
				47365	157.809	87.77	99.52	1578	bin.76.fa
				318732	153.348	92.33	98.55	1649459	bin.89.fa
				4469576	151.553	80.78	98.95	186803	bin.11.fa
				192222	146.596	93.23	99.6	838	bin.97.fa
				4424327	132.211	87.16	98.65	241189	bin.81.fa
				4449518	113.482	88.36	99.25	239759	bin.95.fa
		50-100	>=95%(6)	197875	57.5781	99	98.04	186803	bin.1.fa
				835900	54.56	97.96	97.93	283168	bin.70.fa
				192777	51.7753	98.77	97.72	186803	bin.2.fa
				1108599	50.7384	98.88	98.26	35832	bin.54.fa
				4372003	50.6183	99.78	98.21	375288	bin.36.fa
				164237	50.1979	97.91	99.47	186803	bin.58.fa
			80-95%(3)	4397402	63.0193	80.05	99.68	1578	bin.35.fa
				187233	61.9621	83.44	99.98	1578	bin.26.fa
				181719	61.4834	84.78	98.99	816	bin.106.fa
		30-50	>=95%(9)	245324	46.2169	100	99.92	580024	bin.69.fa
				174824	45.8233	95.39	98.88	186803	bin.33.fa
				182764	44.274	97.35	99.43	1578	bin.14.fa
				3265889	43.0864	97.61	96.31	33042	bin.7.fa
				1107303	42.1273	98.88	99.75	186803	bin.22.fa
				184966	40.5577	98.58	98.45	186803	bin.40.fa
				190114	38.7402	99.97	99.43	1263	bin.31.fa
				259846	30.805	97.79	98.9	186803	bin.88.fa
				162576	30.422	98.73	98.81	186803	bin.114.fa
			80-95%(3)	189840	40.4594	80.27	97.55	541000	bin.104.fa
				336277	35.0912	85.4	98.22	186803	bin.107.fa
				187223	33.1691	93.75	98.68	541000	bin.108.fa
	SpaRC	>=100	>=95%(16)	851733	717.751	100	100	1578	c_bin.5.fa
				135956	538.817	100	100	1578	c_bin.19.fa
				4378740	481.665	99.79	99.76	838	c_3468
				4306262	237.716	99.99	99.68	239934	c_589
				999989	236.457	99.34	99.02	838	c_6500
				463794	219.952	99.74	100	1578	c_bin.15.fa
				169106	157.63	99.36	99.45	1578	c_1486
				4.37874e+06	155.766	99.59	99.76	838	c_3468
				318732	153.348	99.88	98.68	1649459	c_7547
				4469576	151.553	99.45	98.79	186803	c_9069
				192222	146.596	99.95	99.8	838	c_571
				460611	146.427	99.93	98.97	830	c_2317
				1684221	141.681	99.96	99.16	872	c_4551
				304047	114.029	99.81	99.69	816	c_5500
				4449518	113.482	99.68	98.05	239759	c_7334
				4354103	109.622	98.9	100	1578	c_bin.25.fa
			80-95%(2)	47365	157.809	94.67	100	1578	c_bin.24.fa
				4424327	132.211	87.23	99.91	241189	c_bin.2.fa
		50-100	>=95%(4)	181719	61.4834	99.08	99.69	816	c_5500
				1108599	50.7384	99.49	98.41	35832	c_7215
				4372003	50.6183	98.48	96.43	375288	c_6661
				164237	50.1979	99.41	99.99	186803	c_bin.23.fa
			80-95%(2)	187233	61.9621	89.76	99.74	1578	c_8520
				835900	54.56	93.47	95.43	283168	c_688
		30-50	>=95%(1)	136604	34.6395	97.12	98.97	830	c_2317
			80-95%(0)	*	*	*	*	*	*
MetaHIT	Classic	>=100	>=95%(10)	Alistipes_putredinis_DSM_17216_uid54803	513.858	99.1	98.97	Alistipes_putredinis	bin.134.fa
				Dialister_invisus_DSM_15470_uid55761	275.3	99.06	99.77	Dialister_invisus	bin.230.fa
				Barnesiella_intestinihominis_YIT_11860_uid175259	254.022	99.7	99.73	Barnesiella_intestinihominis	bin.29.fa
				Ruminococcus_bromii_uid197158	244.087	96.12	99.16	Ruminococcus_bromii	bin.171.fa
				Alistipes_onderdonkii_DSM_19147_uid199292	224.789	98.67	97.05	Alistipes_onderdonkii	bin.36.fa
				Bacteroides_massiliensis_B84634___DSM_17679_ui...	191.792	97.84	99.09	Bacteroides_massiliensis	bin.20.fa
				Bacteroides_coprocola_DSM_17136_uid54879	169.926	96.91	97.85	Bacteroides_coprocola	bin.15.fa
				Ruminococcus_5_1_39BFAA_uid55629	125.703	97.44	98.83	Ruminococcus_5_1	bin.37.fa
				Roseburia_inulinivorans_DSM_16841_uid55375	124.698	95.06	99.32	Roseburia_inulinivorans	bin.84.fa
				Odoribacter_splanchnicus_DSM_20712_uid63397	118.699	99.09	99.91	Odoribacter_splanchnicus	bin.9.fa
			80-95%(3)	Butyrivibrio_crossotus_DSM_2876_uid55091	527.891	83.56	99.57	Butyrivibrio_crossotus	bin.148.fa
				Eubacterium_eligens_ATCC_27750_uid59171	350.853	91.42	99.15	Eubacterium_eligens	bin.119.fa
				Faecalibacterium_cf__prausnitzii_KLE1255_uid60645	163.584	93.36	99.88	Faecalibacterium_prausnitzii	bin.224.fa
		50-100	>=95%(8)	Coprococcus_comes_ATCC_27758_uid54883	93.8309	97.89	98.86	Coprococcus_comes	bin.57.fa
				Akkermansia_muciniphila_ATCC_BAA_835_uid58985	92.5301	99.68	99.89	Akkermansia_muciniphila	bin.191.fa
				Dorea_longicatena_DSM_13814_uid54515	90.0796	98.23	98.59	Dorea_longicatena	bin.71.fa
				Eubacterium_hallii_DSM_3353_uid54535	76.0297	99.09	99.48	Eubacterium_hallii	bin.31.fa
				Eubacterium_rectale_uid197161	72.7439	95.38	98.26	Eubacterium_rectale	bin.135.fa
				Eubacterium_rectale_ATCC_33656_uid59169	72.2249	95.64	98.26	Eubacterium_rectale	bin.135.fa
				Ruminococcus_lactaris_ATCC_29176_uid54903	57.544	97.79	98	Ruminococcus_lactaris	bin.95.fa
				Bacteroides_caccae_ATCC_43185_uid54521	51.124	98.01	98.32	Bacteroides_caccae	bin.7.fa
			80-95%(5)	Bacteroides_cellulosilyticus_DSM_14838_uid55279	89.3418	94.51	95.11	Bacteroides_cellulosilyticus	bin.4.fa
				Alistipes_shahii_WAL_8301_uid197175	84.6554	91.56	97.53	Alistipes_shahii	bin.115.fa
				Eubacterium_rectale_uid197162	67.4216	94.85	98.26	Eubacterium_rectale	bin.135.fa
				Bacteroides_cellulosilyticus_CL02T12C19_uid181624	59.5895	93.78	95.11	Bacteroides_cellulosilyticus	bin.4.fa
				Bacteroidales_bacterium_ph8_uid199652	53.6386	93.77	97.89	Bacteroidales_bacterium_ph8	bin.178.fa
		30-50	>=95%(6)	Bifidobacterium_adolescentis_L2_32_uid54549	42.8527	97.66	99.9	Bifidobacterium_adolescentis	bin.147.fa
				Bacteroides_caccae_CL03T12C61_uid181623	42.5367	97.66	98.32	Bacteroides_caccae	bin.7.fa
				Sutterella_wadsworthensis_3_1_45B_uid62165	35.8203	99.53	99.94	Sutterella_wadsworthensis_3_1	bin.205.fa
				Bacteroides_salyersiae_CL02T12C01_uid170041	35.0325	98.63	98.86	Bacteroides_salyersiae	bin.5.fa
				Roseburia_intestinalis_uid197164	32.2471	96.14	97.77	Roseburia_intestinalis	bin.22.fa
				Bifidobacterium_adolescentis_ATCC_15703_uid58559	31.4581	99.69	99.9	Bifidobacterium_adolescentis	bin.147.fa
			80-95%(9)	Ruminococcus_torques_uid197166	48.7854	92.11	98.49	Ruminococcus_torques	bin.189.fa
				Subdoligranulum_4_3_54A2FAA_uid80415	43.0258	91.73	99.16	Subdoligranulum_4_3	bin.49.fa
				Roseburia_intestinalis_L1_82_uid55267	40.0455	94.1	97.77	Roseburia_intestinalis	bin.22.fa
				Bacteroides_coprophilus_DSM_18228_uid55301	38.9448	92.12	96.19	Bacteroides_coprophilus	bin.83.fa
				Roseburia_hominis_A2_183_uid73419	38.4577	93.23	99.55	Roseburia_hominis	bin.158.fa
				Eubacterium_siraeum_uid197160	37.3667	89.67	99.44	Eubacterium_siraeum	bin.282.fa
				Ruminococcus_obeum_ATCC_29174_uid54509	36.5743	92.9	99.06	Ruminococcus_obeum	bin.78.fa
				Roseburia_intestinalis_XB6B4_uid197179	34.5522	94.91	97.77	Roseburia_intestinalis	bin.22.fa
				Bacteroides_pectinophilus_ATCC_43243_uid54987	32.0746	88.23	99.01	Bacteroides_pectinophilus	bin.139.fa
	SpaRC	>=100	>=95%(9)	Butyrivibrio_crossotus_DSM_2876_uid55091	527.891	95.91	99.22	Butyrivibrio_crossotus	c_92536
				Alistipes_putredinis_DSM_17216_uid54803	513.858	99.4	98.37	Alistipes_putredinis	c_bin.28
				Eubacterium_eligens_ATCC_27750_uid59171	350.853	98.06	99.06	Eubacterium_eligens	c_bin.29
				Dialister_invisus_DSM_15470_uid55761	275.3	96.12	100	Dialister_invisus	c_48010
				Barnesiella_intestinihominis_YIT_11860_uid175259	254.022	99.88	99.75	Barnesiella_intestinihominis	c_bin.15
				Ruminococcus_bromii_uid197158	244.087	96.18	99.69	Ruminococcus_bromii	c_bin.40
				Bacteroides_massiliensis_B84634___DSM_17679_ui...	191.792	99.2	98.68	Bacteroides_massiliensis	c_bin.9
				Bacteroides_coprocola_DSM_17136_uid54879	169.926	99.84	96.48	Bacteroides_coprocola	c_bin.6
				Faecalibacterium_cf__prausnitzii_KLE1255_uid60645	163.584	97.16	99.81	Faecalibacterium_prausnitzii	c_bin.56
			80-95%(2)	Prevotella_copri_DSM_18205_uid55277	1073.21	93.74	99.91	Prevotella_copri	c_bin.41
				Roseburia_inulinivorans_DSM_16841_uid55375	124.698	87.51	96.11	Roseburia_inulinivorans	c_bin.55
		50-100	>=95%(2)	Akkermansia_muciniphila_ATCC_BAA_835_uid58985	92.5301	99.89	99.96	Akkermansia_muciniphila	c_bin.57
				Eubacterium_rectale_uid197162	67.4216	96.7	97.84	Eubacterium_rectale	c_bin.32
			80-95%(2)	Bacteroides_cellulosilyticus_DSM_14838_uid55279	89.3418	82.44	95.97	Bacteroides_cellulosilyticus	c_228882
				Clostridium_L2_50_uid54559	87.6216	84.82	99.13	Clostridium_L2_50	c_82411
		30-50	>=95%(1)	Bifidobacterium_adolescentis_L2_32_uid54549	42.8527	99.59	99.58	Bifidobacterium_adolescentis	c_bin.47
			80-95%(0)	*	*	*	*	*	*
