# Supplementary material for: Deconvolute individual genomes from metagenome sequences through short read clustering
Source: PeerJ journal article supplement (doi:10.7717/peerj.8966), 2020-04-08

Memory saved in Mock and CAMI dataset

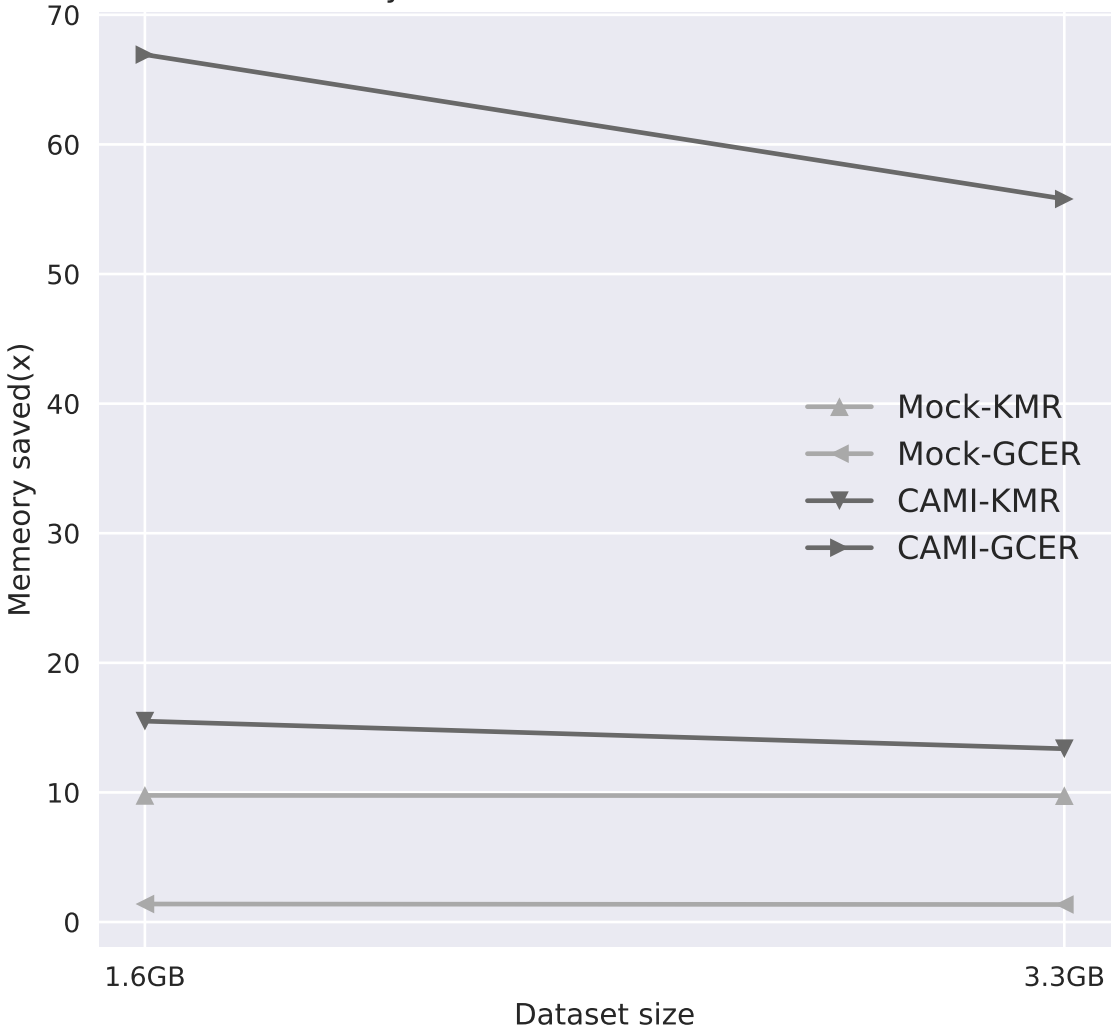

Time saved in Mock and CAMI dataset

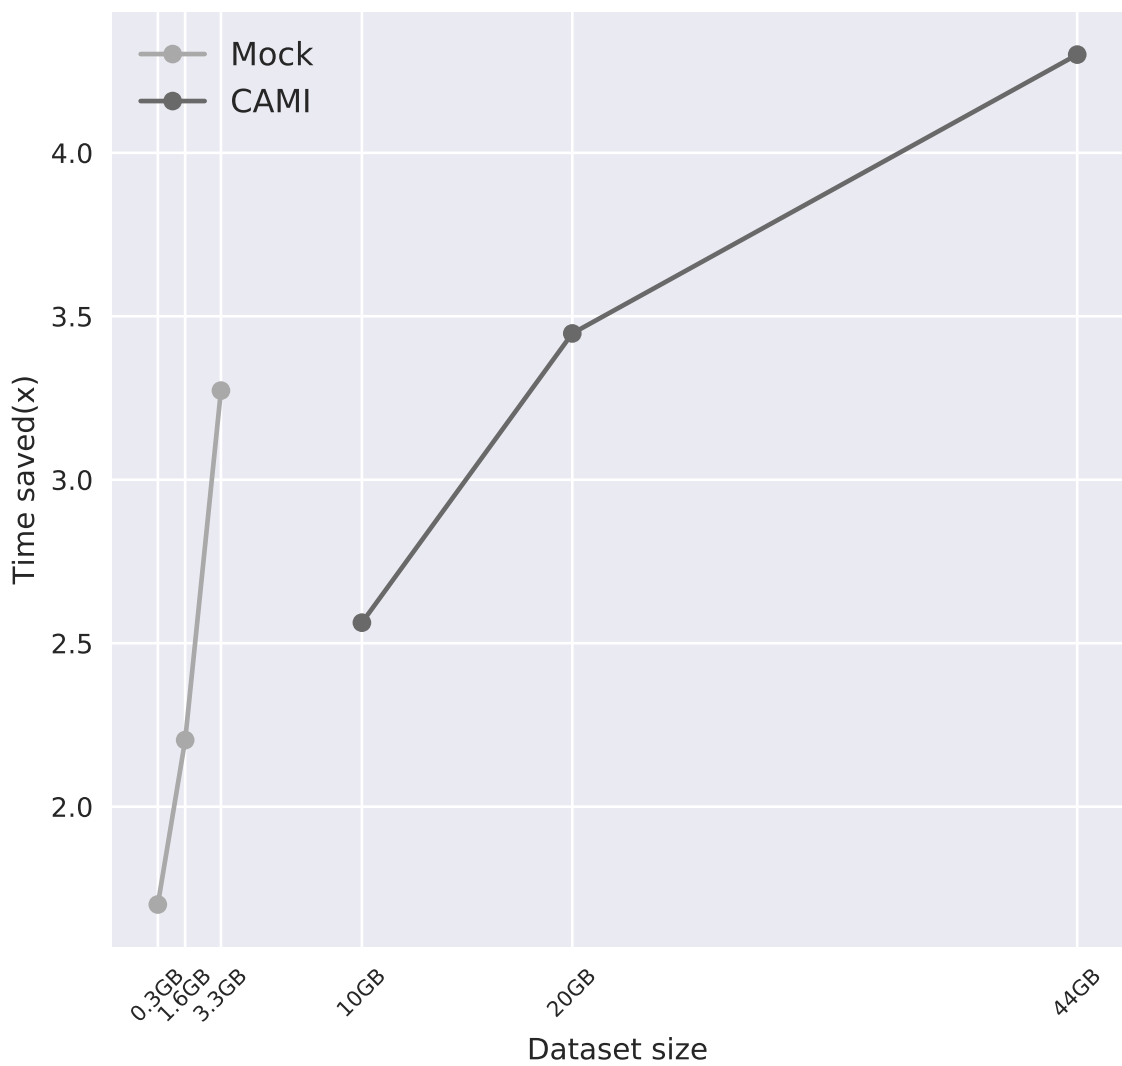

Supplement: Supplemental_Figure1.pdf [file Supplemental_Figure1.pdf]
